# Supplementary material for: Blockade of the N-Methyl-D-Aspartate Glutamate Receptor Ameliorates Lipopolysaccharide-Induced Renal Insufficiency
Source: PubMed Central journal article supplement (PMC4489897; doi:10.1371/journal.pone.0132204), 2015-07-02
Supplement: pone.0132204.s003.pdf [file pone.0132204.s003.pdf]

**S1 Table. The primer sequences used for real-time RT-PCR.**

| Species<br>(GenBank<br>entries)            | Gene  | Primer sequences                                                                         |
|--------------------------------------------|-------|------------------------------------------------------------------------------------------|
| <i>Rattus norvegicus</i><br>(NM_001287423) | NR1   | Forward 5'-GAA TGA TGG GCG AGC TAC TCA-3'<br>Reverse 5'-ACG CTC ATT GTT GAT GGT CAG T-3' |
| <i>Rattus norvegicus</i><br>(NM_0178008)   | GAPDH | Forward 5'-CCC CCA ATG TAT CCG TTG TG-3'<br>Reverse 5'-TAG CCC AGG ATG CCC TTT AGT-3'    |
| <i>Sus scrofa</i><br>(XM_005659036)        | NR1   | Forward 5'-ATT CCC CAC CCC CAG CAG AG-3'<br>Reverse 5'-GCC ACA ACC TGG ATC TGG GT-3'     |
| <i>Sus scrofa</i><br>(NM_001206359)        | GAPDH | Forward 5'-ACA CTC ACT CTT CCA CTT TTG-3'<br>Reverse 5'-CAA ATT CAT TGT CGT ACC AG-3'    |
| <i>Canis lupus</i><br>(NM_001008717)       | NR1   | Forward 5'-GTC CAT CTA CTC AGA CAA GAG-3'<br>Reverse 5'-GAA CCA GAC GCT CGA CTG GT-3'    |
| <i>Canis lupus</i><br>(NM_001003142)       | GAPDH | Forward 5'-AAC ATC ATC CCT GCT TCC AC-3'<br>Reverse 5'-GGC AGG TCA GAT CCA CAA CT-3'     |
