# Supplementary material for: Blockade of the N-Methyl-D-Aspartate Glutamate Receptor Ameliorates Lipopolysaccharide-Induced Renal Insufficiency
Source: PubMed Central journal article supplement (PMC4489897; doi:10.1371/journal.pone.0132204), 2015-07-02
Supplement: pone.0132204.s004.pdf [file pone.0132204.s004.pdf]

**S2 Table. Basic body data for groups.**

| Group        | BW<br>(g) | LKW<br>(g)  | Plasma<br>[Na <sup>+</sup> ]<br>(mEq) | Hct<br>(%) |
|--------------|-----------|-------------|---------------------------------------|------------|
| Control      | 218 ± 8   | 1.02 ± 0.08 | 139.2 ± 0.5                           | 43.2 ± 1.1 |
| LPS8         | 221 ± 7   | 1.05 ± 0.09 | 140.6 ± 0.3                           | 42.1 ± 1.3 |
| LPS24        | 213 ± 9   | 1.07 ± 0.10 | 140.9 ± 0.6                           | 44.6 ± 2.1 |
| LPS48        | 216 ± 10  | 1.11±0.11   | 141.1 ± 0.8                           | 43.9±0.9   |
| MK-801       | 220 ± 9   | 1.04 ± 0.09 | 140.5 ± 0.3                           | 41.3 ± 1.6 |
| LPS8+MK-801  | 225 ± 8   | 1.06 ± 0.10 | 140.2 ± 0.4                           | 42.3 ± 1.8 |
| LPS24+MK-801 | 221 ± 10  | 0.99 ± 0.08 | 139.4 ± 0.6                           | 40.6 ± 1.5 |
| LPS48+MK-801 | 218 ± 7   | 1.01 ± 0.07 | 139.1 ± 0.4                           | 41.2 ± 0.9 |

Eight rats in each group. BW, body weight; LKW, left kidney weight; Hct, hematocrit.
